# Supplementary figures and images for: Diversity and evolution of the small multidrug resistance protein family
Source: Springer Nature journal article supplement (doi:10.1186/1471-2148-9-140), 2009-01-01

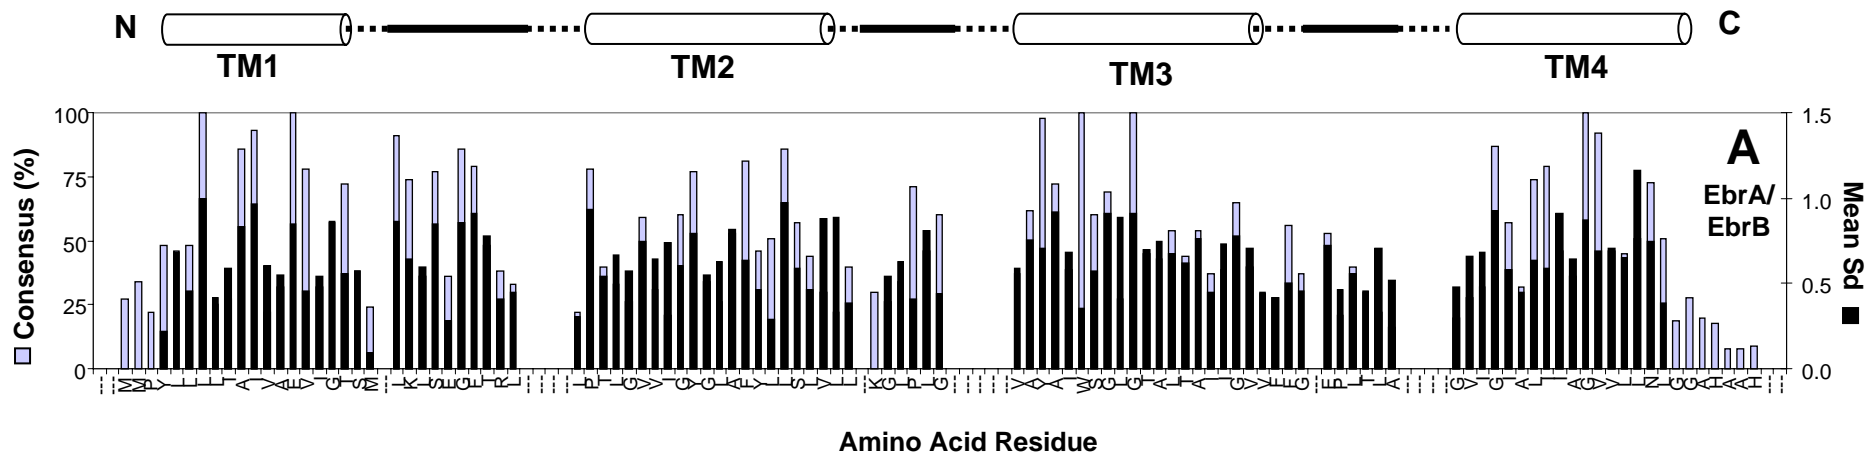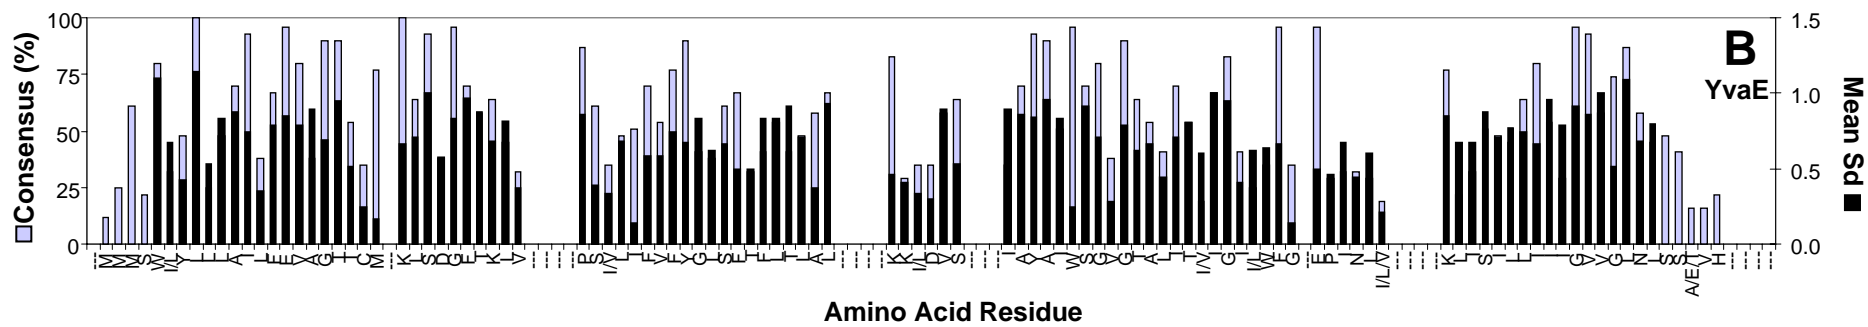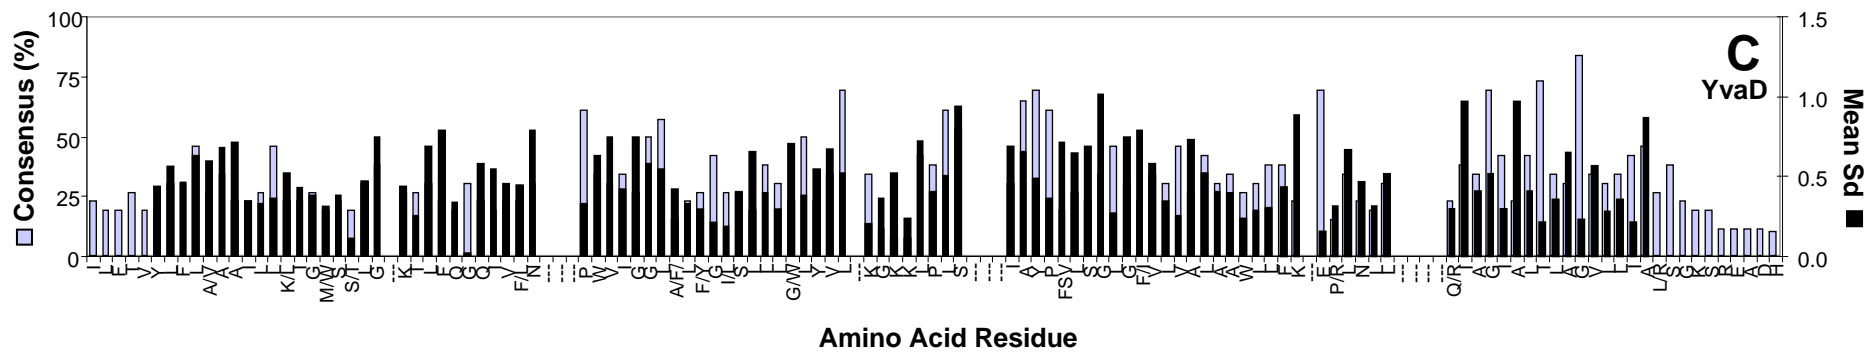

Supplement: 12862_2008_1054_MOESM7_ESM.pdf [file 12862_2008_1054_MOESM7_ESM.pdf]
